# Supplementary material for: Investigation of Linum flavum (L.) Hairy Root Cultures for the Production of Anticancer Aryltetralin Lignans
Source: PubMed Central journal article supplement (PMC5979590; doi:10.3390/ijms19040990), 2018-03-26
Supplement: ijms-19-00990-s001.pdf [file ijms-19-00990-s001.pdf]

# Supplementary Materials: Investigation of *Linum flavum* (L.) Hairy Root Cultures for the Production of Anticancer Aryltetralin Lignans

Sullivan Renouard, Cyrielle Corbin, Samantha Drouet, Barbara Medvedec, Joël Doussot, Cyril Colas, Benoit Maunit, Avninder S. Bhambra, Eric Gontier, Nathalie Jullian, François Mesnard, Michèle Boitel, Bilal Haider Abbasi, Randolph R. J. Arroo, Eric Lainé, Christophe Hano

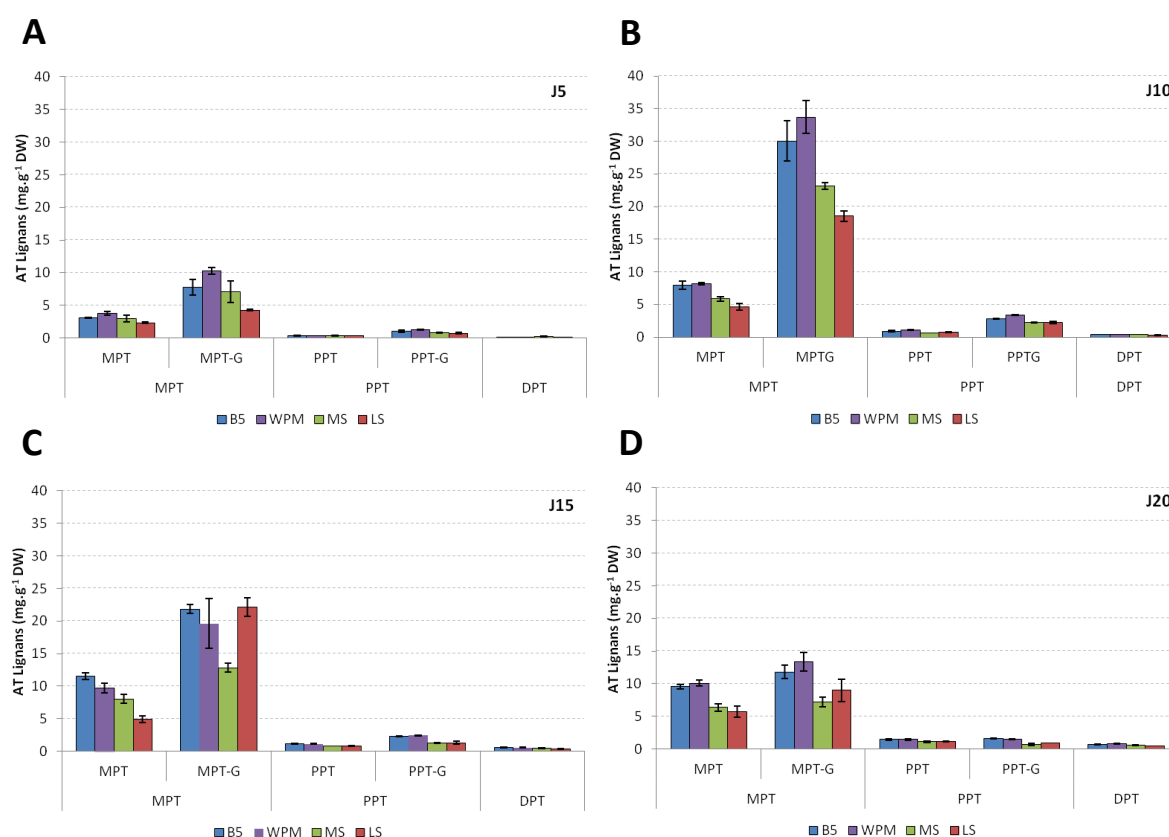

**Figure S1.** Detailed intracellular ATL accumulation kinetics of the main ATL and their glucosylated forms in HRLF15.2 line growing in the B5, WPM, MS and LS culture media. Each point is the mean and standard deviation of the three independent experiments.

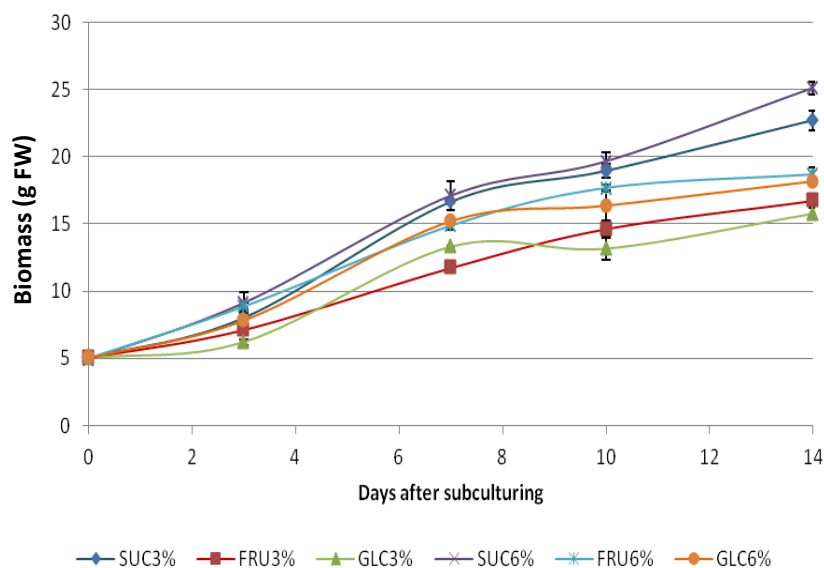

**Figure S2.** Growth kinetic of the HRLF15.2 line growing in the B5 medium supplemented with 3 or 6% (w/v) sucrose (SUC), fructose (FRU) or glucose (GLC). Each point is the mean and standard deviation of the three independent experiments.

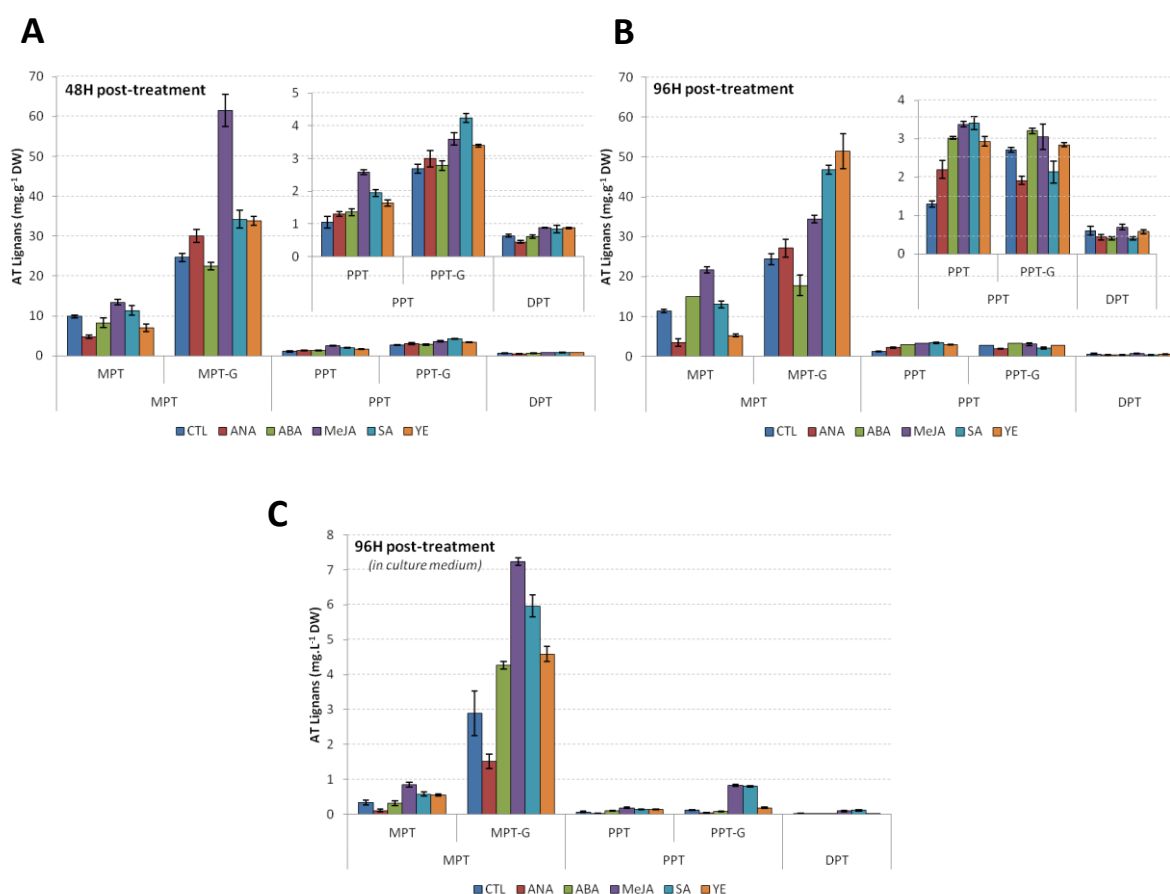

**Figure S3.** Detailed intracellular ATL accumulation kinetics of the main ATL and their glucosylated forms in HRLF15.2 line treated with ANA (1 mg/ml), ABA (100  $\mu$ M), MeJA (100  $\mu$ M), SA (100  $\mu$ M) or YE (3% w/v). **A.** Intracellular contents measured 48h post treatment; **B.** Intracellular contents measured 96h post treatment; **C.** Extracellular contents measured 96h post treatment. Each point is the mean and standard deviation of the three independent experiments.

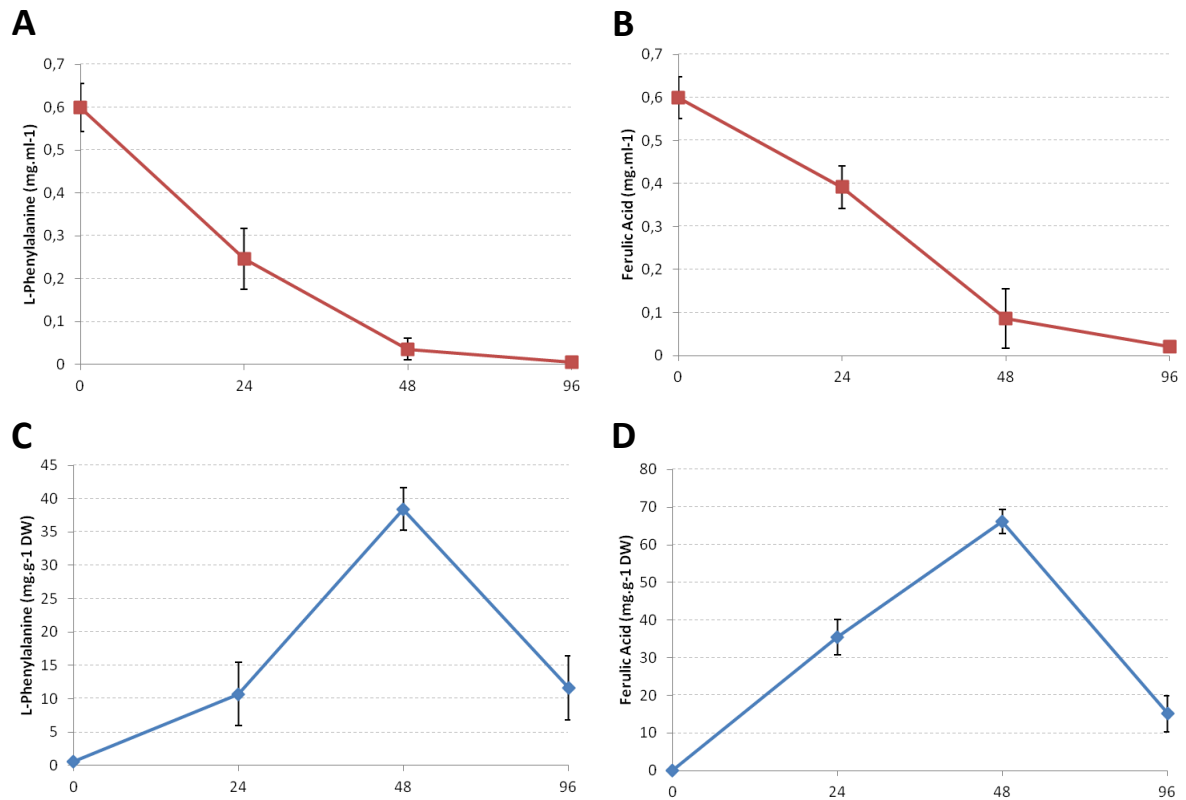

**Figure S4.** l-Phe or ferulic acid uptakes during precursors feeding of HRLF15.2 line. A. Time course of extracellular l-Phe concentration. B. Time course of extracellular ferulic acid concentration. C. Time course of intracellular l-Phe concentration. D. Time course of intracellular ferulic acid concentration. Each point is the mean and standard deviation of the three independent experiments.

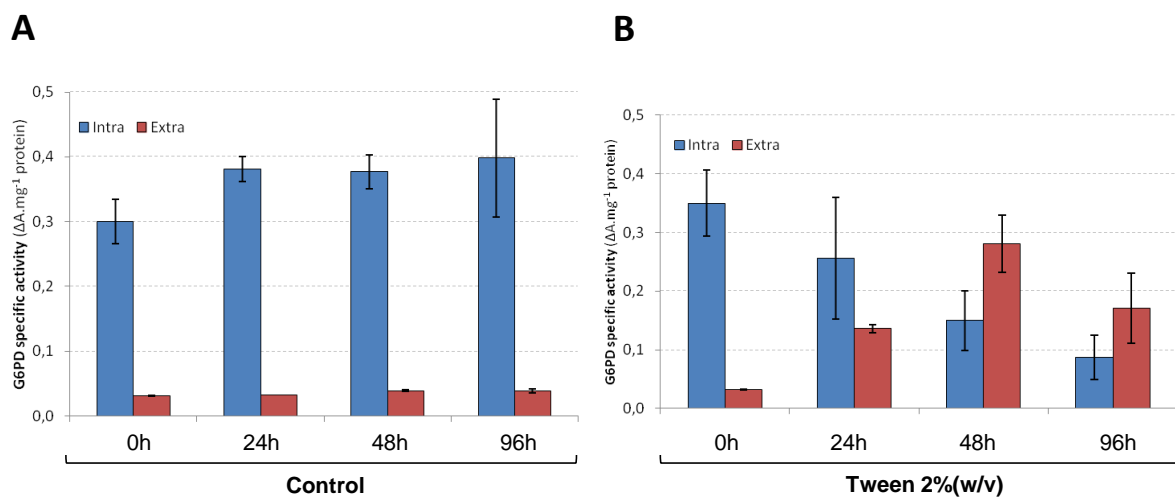

**Figure S5.** Time course of intracellular and extracellular G6PD activity in control (A) and 2% (w/v) Tween 20-treated (B) HRLF15.2 line. Each point is the mean and standard deviation of the three independent experiments.

## DPT

Analysis: X003673CYC.d

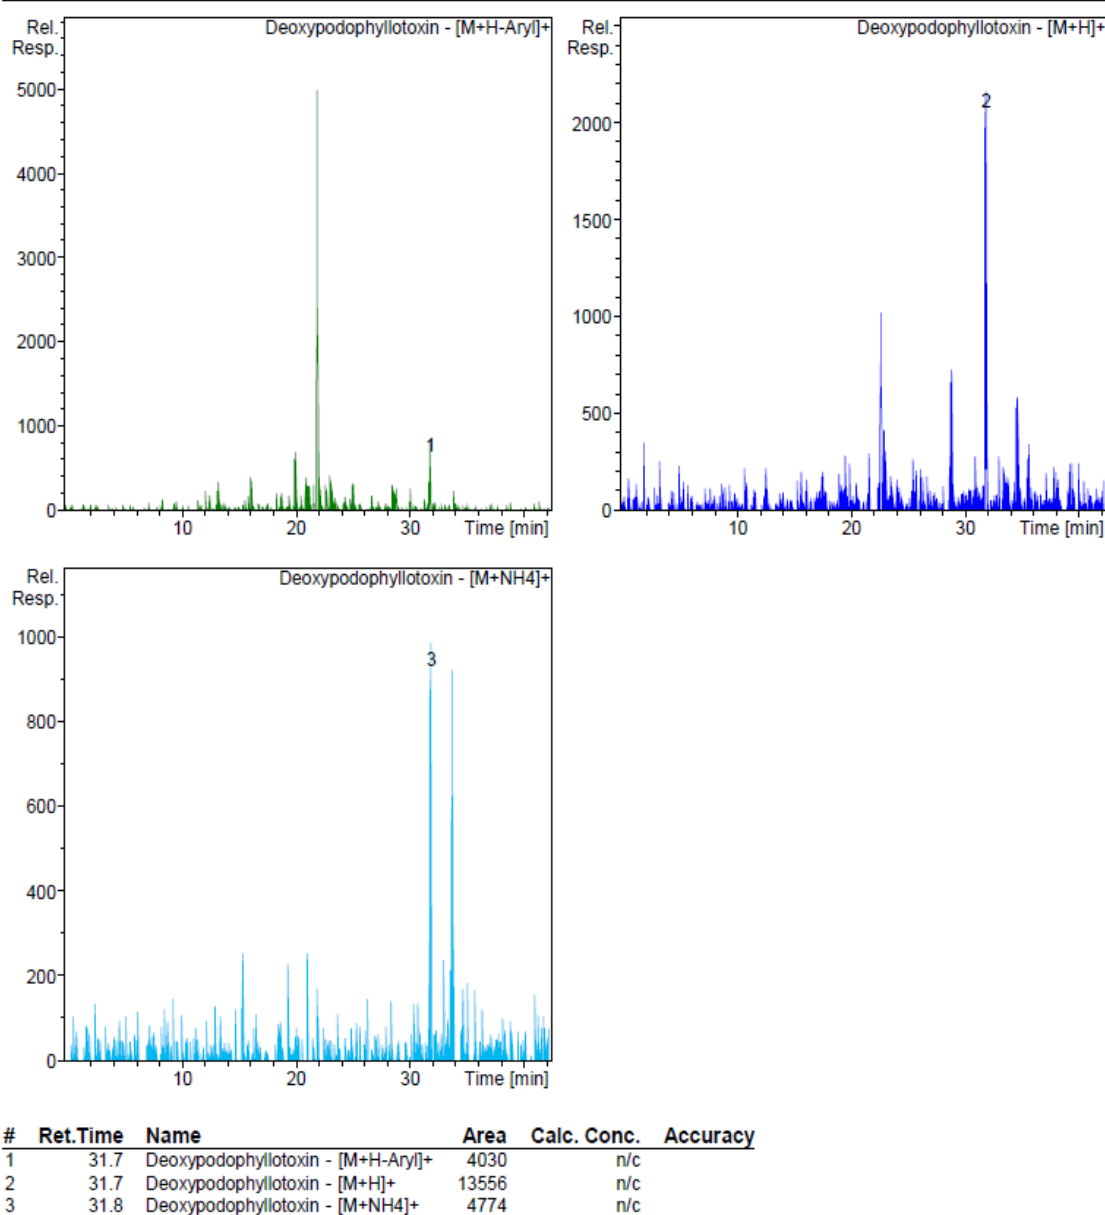

Figure S6. Extracted Ion Chromatogram for DPT from HRLF15.2 line.

## PPT

Analysis: X003673CYC.d

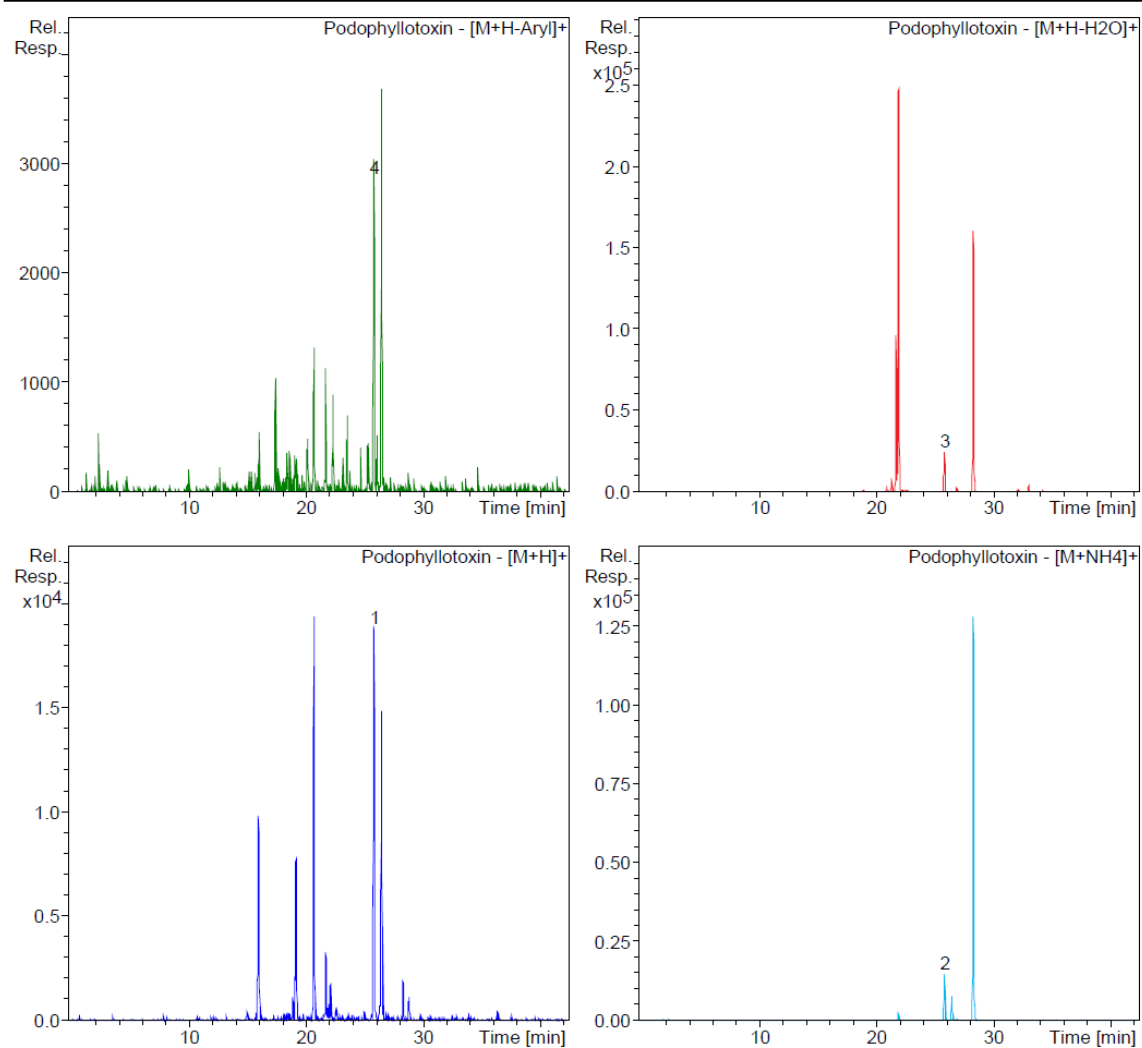

| # | Ret.Time | Name                                                  | Area   | Calc. Conc. | Accuracy |
|---|----------|-------------------------------------------------------|--------|-------------|----------|
| 1 | 25.8     | Podophyllotoxin - [M+H] <sup>+</sup>                  | 121297 | n/c         |          |
| 2 | 25.8     | Podophyllotoxin - [M+NH <sub>4</sub> ] <sup>+</sup>   | 87367  | n/c         |          |
| 3 | 25.8     | Podophyllotoxin - [M+H-H <sub>2</sub> O] <sup>+</sup> | 157837 | n/c         |          |
| 4 | 25.9     | Podophyllotoxin - [M+H-Aryl] <sup>+</sup>             | 18537  | n/c         |          |

Figure S7. Extracted Ion Chromatogram for PPT from HRLF15.2 line.

## PPTG

Analysis: X003673CYC.d

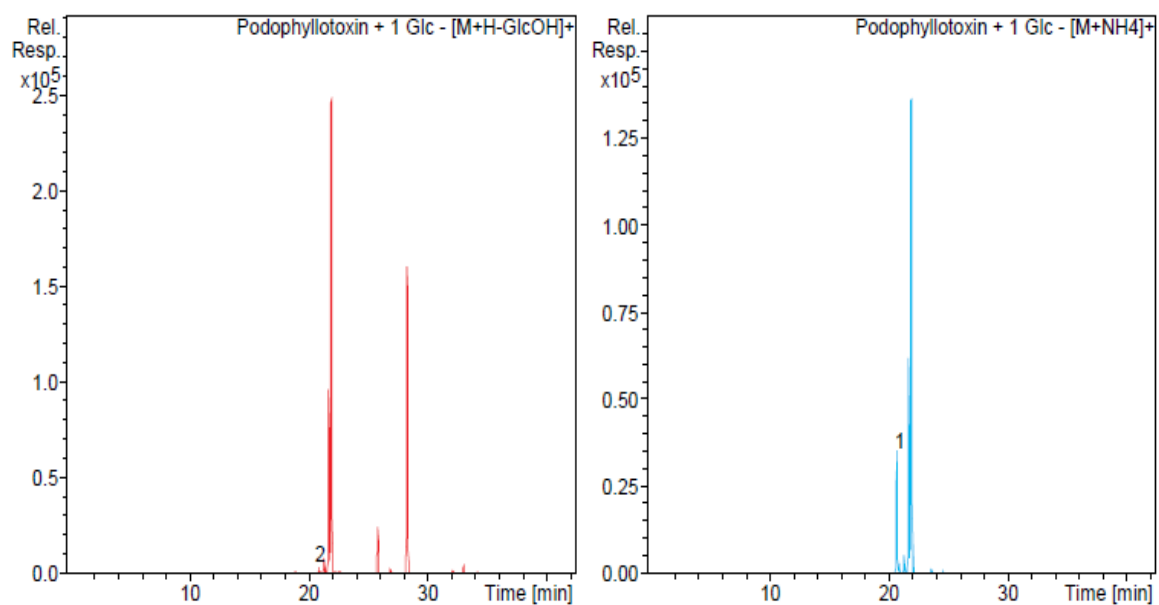

| # | Ret.Time | Name                                                        | Area  | Calc. Conc. | Accuracy |
|---|----------|-------------------------------------------------------------|-------|-------------|----------|
| 1 | 21.0     | Podophyllotoxin + 1 Glc - [M+NH <sub>4</sub> ] <sup>+</sup> | 16627 | n/c         |          |
| 2 | 21.0     | Podophyllotoxin + 1 Glc - [M+H-GlcOH] <sup>+</sup>          | 16518 | n/c         |          |

Figure S8. Extracted Ion Chromatogram for PPTG from HRLF15.2 line.

## MPT

Analysis: X003673CYC.d

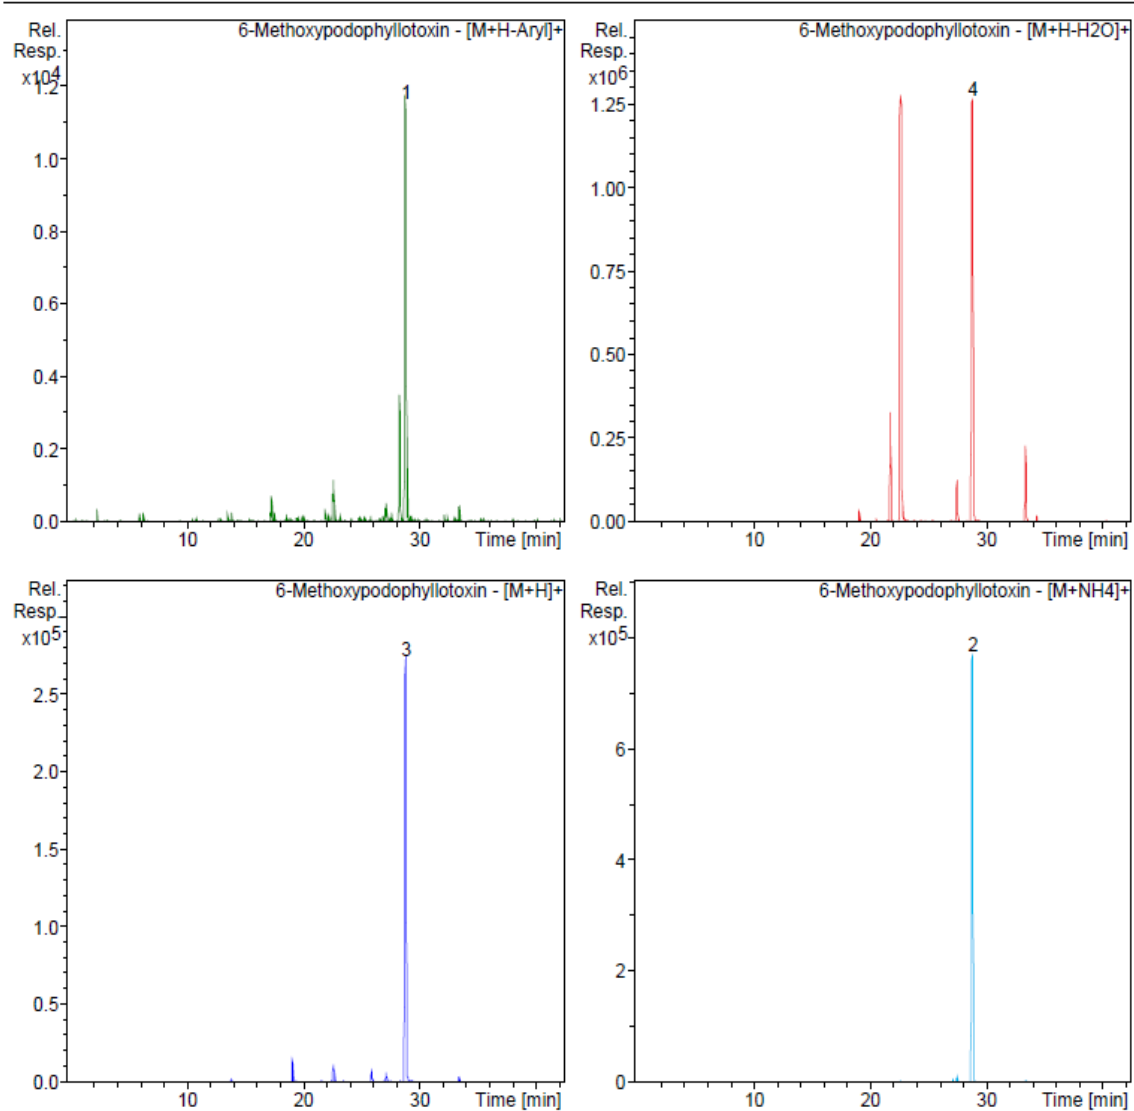

| # | Ret.Time | Name                                   | Area     | Calc. Conc. | Accuracy |
|---|----------|----------------------------------------|----------|-------------|----------|
| 1 | 28.8     | 6-Methoxypodophyllotoxin - [M+H-Aryl]+ | 86265    | n/c         |          |
| 2 | 28.8     | 6-Methoxypodophyllotoxin - [M+NH4]+    | 6198990  | n/c         |          |
| 3 | 28.8     | 6-Methoxypodophyllotoxin - [M+H]+      | 2223010  | n/c         |          |
| 4 | 28.8     | 6-Methoxypodophyllotoxin - [M+H-H2O]+  | 12375094 | n/c         |          |

Figure S9. Extracted Ion Chromatogram for MPT from HRLF15.2 line.

## MPTG

Analysis: X003673CYC.d

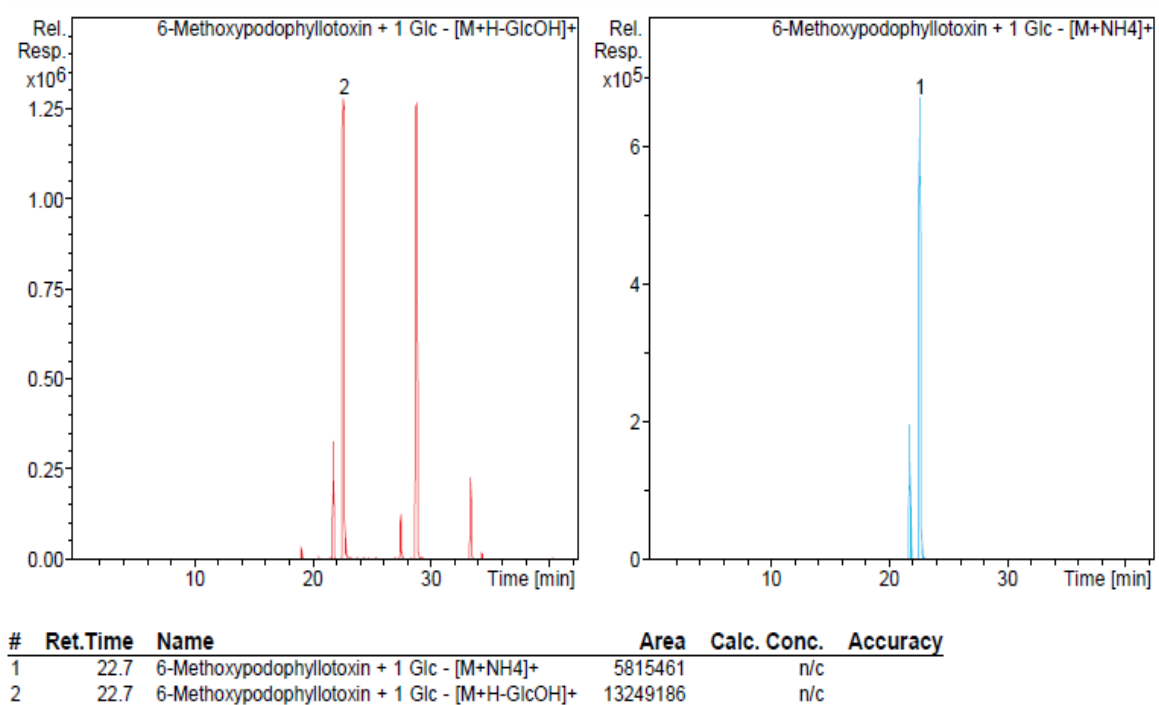

**Figure S10.** Extracted Ion Chromatogram for MPTG from HRLF15.2 line.



**Table S1.** Lignans identification in *L. flavum* HR cell lines with LC-HR-MS fragmentation.

| RT<br>(min) | Compound                           | Abbreviation | Formula   | MW  | [M+Na] <sup>+</sup> | [M+H] <sup>+</sup> | [M+NH4] <sup>+</sup> |
|-------------|------------------------------------|--------------|-----------|-----|---------------------|--------------------|----------------------|
| 21.77       | podophyllotoxin-7-glucose          | PPT-G        | C22H32O13 | 576 | 599.1735            | 577.1916           | 594.2181             |
| 22.67       | 6-methoxypodophyllotoxin-7-glucose | MPT-G        | C29H34O14 | 606 | 629.1841            | 607.2021           | 629.1841             |
| 25.93       | podophyllotoxin                    | PPT          | C22H22O8  | 414 | 437.1207            | 415.1387           | 432.1653             |
| 28.8        | 6-methoxypodophyllotoxin           | MPT          | C23H24O9  | 444 | 467.1313            | 445.1493           | 462.1759             |
| 31.85       | deoxypodophyllotoxin               | DPT          | C22H22O7  | 398 | 421.1302            | 399.1483           | 416.1748             |

**Table S2.** Analytical performance of the proposed method.

| Analytes | Calibration          | R <sup>2</sup> | Range tested<br>µg/mL | LOD<br>µg/mL | LOQ<br>µg/mL |
|----------|----------------------|----------------|-----------------------|--------------|--------------|
| DPT      | y = 0.0055x - 0.0024 | 0.9993         | 125 - 1000            | 0.06         | 0.20         |
| PPT      | y = 0.0059x - 0.0017 | 0.9992         | 125 - 1000            | 0.09         | 0.96         |
| MPT-G    | y = 0.0059x - 0.0116 | 0.9993         | 62.5-1000             | 0.81         | 2.43         |
| MPT      | y = 0.0066x - 0.0243 | 0.9998         | 62.5-1000             | 0.37         | 1.24         |

**Table S3.** Ions content of the basal medium, in mM

|     | Total N | NH <sub>4</sub> <sup>+</sup> /Total N | PO <sub>4</sub> <sup>2-</sup> | SO <sub>4</sub> <sup>2-</sup> | Ca <sup>2+</sup> | K <sup>+</sup> | Mg <sup>2+</sup> |
|-----|---------|---------------------------------------|-------------------------------|-------------------------------|------------------|----------------|------------------|
| MS  | 60      | 0.34                                  | 1.9                           | 1.5                           | 3                | 20             | 1.5              |
| LS  | 60      | 0.34                                  | 1.9                           | 1.5                           | 3                | 20             | 1.5              |
| B5  | 27      | 0.08                                  | 1.1                           | 2.2                           | 1.1              | 25             | 1                |
| WPM | 14.7    | 0.33                                  | 1.9                           | 7                             | 3                | 7              | 1.5              |

**Table S4.** Net synthesis of AT Lignans during supplementation or permeabilization experiments.

|              |              | Φ (0h-24h)<br>mg.g <sup>-1</sup> .h <sup>-1</sup> | Φ (24h-48h)<br>mg.g <sup>-1</sup> .h <sup>-1</sup> | Φ (48h-96h)<br>mg.g <sup>-1</sup> .h <sup>-1</sup> |
|--------------|--------------|---------------------------------------------------|----------------------------------------------------|----------------------------------------------------|
| <b>MPT-G</b> | <b>CTL</b>   | -0.088 ± 0.035                                    | -0.181 ± 0.035                                     | -0.067 ± 0.010                                     |
|              | <b>L-Phe</b> | -0.095 ± 0.015                                    | +0.073 ± 0.020                                     | +0.075 ± 0.053                                     |
|              | <b>Fer</b>   | -0.091 ± 0.073                                    | +0.378 ± 0.135                                     | +0.523 ± 0.070                                     |
|              | <b>Tween</b> | -0.418 ± 0.011                                    | -0.517 ± 0.027                                     | +0.130 ± 0.053                                     |
| <b>MPT</b>   | <b>CTL</b>   | -0.022 ± 0.015                                    | -0.035 ± 0.014                                     | -0.019 ± 0.007                                     |
|              | <b>L-Phe</b> | -0.023 ± 0.008                                    | -0.002 ± 0.008                                     | +0.006 ± 0.007                                     |
|              | <b>Fer</b>   | +0.012 ± 0.004                                    | +0.282 ± 0.015                                     | +0.234 ± 0.022                                     |
|              | <b>Tween</b> | -0.073 ± 0.013                                    | -0.130 ± 0.014                                     | -0.063 ± 0.006                                     |
| <b>PPT-G</b> | <b>CTL</b>   | +0.015 ± 0.005                                    | +0.010 ± 0.007                                     | -0.001 ± 0.001                                     |
|              | <b>L-Phe</b> | +0.010 ± 0.002                                    | +0.028 ± 0.002                                     | +0.013 ± 0.002                                     |
|              | <b>Fer</b>   | +0.029 ± 0.005                                    | +0.064 ± 0.007                                     | +0.052 ± 0.004                                     |
|              | <b>Tween</b> | +0.021 ± 0.009                                    | +0.035 ± 0.009                                     | +0.040 ± 0.006                                     |
| <b>PPT</b>   | <b>CTL</b>   | +0.011 ± 0.003                                    | +0.008 ± 0.007                                     | +0.009 ± 0.002                                     |
|              | <b>L-Phe</b> | +0.017 ± 0.003                                    | +0.037 ± 0.003                                     | +0.029 ± 0.000                                     |
|              | <b>Fer</b>   | +0.044 ± 0.009                                    | +0.107 ± 0.013                                     | +0.069 ± 0.007                                     |
|              | <b>Tween</b> | +0.004 ± 0.001                                    | +0.014 ± 0.002                                     | +0.009 ± 0.001                                     |
| <b>DPT</b>   | <b>CTL</b>   | +0.003 ± 0.002                                    | +0.012 ± 0.002                                     | +0.005 ± 0.002                                     |
|              | <b>L-Phe</b> | +0.003 ± 0.002                                    | +0.016 ± 0.002                                     | +0.008 ± 0.001                                     |
|              | <b>Fer</b>   | +0.008 ± 0.001                                    | +0.024 ± 0.000                                     | +0.020 ± 0.001                                     |
|              | <b>Tween</b> | +0.000 ± 0.001                                    | -0.002 ± 0.002                                     | -0.001 ± 0.000                                     |

Values are the means (± SD) of 3 replicates.
